# Supplementary material for: Assay to visualize specific protein oxidation reveals spatio-temporal regulation of SHP2
Source: Springer Nature journal article supplement (doi:10.1038/s41467-017-00503-w), 2017-08-31
Supplement: MOESM1 [file 41467_2017_503_MOESM1_ESM.pdf]

File Name: Supplementary Information  
Description: Supplementary Figures

File Name: Peer Review File

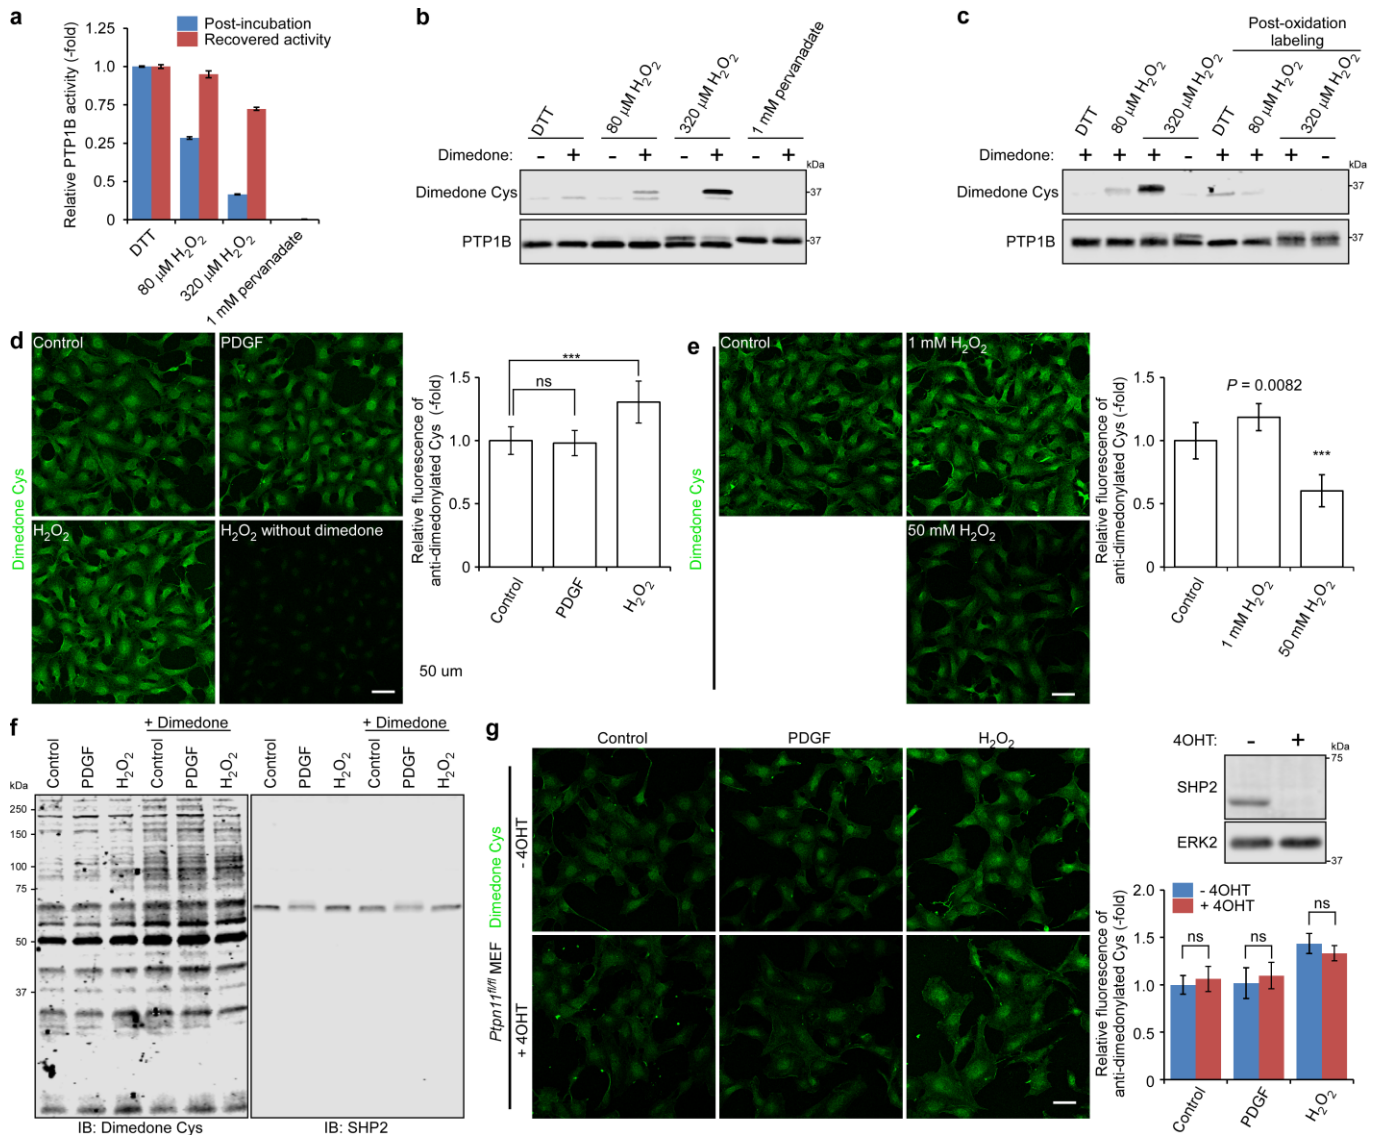

**Supplementary Fig. 1.** Dimeredone labels reversibly oxidized Cys residues *in vitro* and in cells. **(a)** Purified recombinant PTP1B (1-321) was incubated under the indicated conditions for 30 min. Reaction mixtures were then subjected to *in vitro* phosphatase assays using *p*NPP as substrate, either immediately (post-oxidation) or after an additional incubation with DTT (10 mM) and catalase (5 U) (recovered activity). Relative phosphatase activities are shown in the graph, setting the activity of DTT-treated PTP1B as 1. Representative data from 2 experiments are shown. Error bars indicate SD ( $n = 3$  technical replicates). **(b)** PTP1B was incubated with or without 5 mM dimeredone under the indicated conditions for 5 min, followed by SDS-PAGE and immunoblotting with anti-dimeredone Cys and anti-PTP1B antibodies. Representative data from 3 experiments are shown. **(c)** Purified PTP1B was labeled with dimeredone (5 mM) for 5 min under the indicated conditions or after pre-incubation with the indicated concentrations of

DTT or H<sub>2</sub>O<sub>2</sub>, followed by immunoblotting with anti-dimedone-Cys and anti-PTP1B antibodies. Representative data from 2 experiments are shown. **(d)** Serum-starved Swiss 3T3 cells were treated with PDGF-BB (50 ng ml<sup>-1</sup>) or H<sub>2</sub>O<sub>2</sub> (1 mM) for 10 min. Cells were fixed in the presence or absence of dimedone (5 mM) for 5 min, and subjected to immunostaining with anti-dimedone-Cys antibodies (green). Representative images are shown for each condition from one of 2 independent experiments. The graph shows the average intensities of the anti-dimedone Cys signal subtracted by background signal in the images, relative to the values in untreated control cells ( $n = 10$  images). Error bars represent SD. \*\*\* $P < 0.0001$ , ns: not significant, ANOVA with Bonferroni/Dunn's post-hoc test. **(e)** Serum-starved Swiss 3T3 cells were treated with H<sub>2</sub>O<sub>2</sub> (1 mM or 50 mM) for 10 min. Cells were then fixed in the presence of dimedone (5 mM) for 5 min, and subjected to immunostaining with anti-dimedone Cys antibodies (green). Representative images are shown for each condition from one of 2 independent experiments. The graph shows the average intensities of the anti-dimedone Cys signal with the background signal in each image subtracted, relative to the values in untreated control cells ( $n = 10$  images). Error bars represent SD. \*\*\* $P < 0.0001$  to control cells, ANOVA with Bonferroni/Dunn's post-hoc test. **(f)** Serum-starved Swiss 3T3 cells were treated with PDGF-BB (50 ng ml<sup>-1</sup>) or H<sub>2</sub>O<sub>2</sub> (1 mM) for 10 min, followed by treatment with dimedone (5 mM) for 30 min. Lysates were immunoblotted with anti-dimedone-Cys and anti-SHP2 antibodies. Representative images are shown from one of 2 independent experiments. **(g)** Serum-starved *Ptpn11*<sup>fl/fl</sup> MEFs expressing CRE-ER<sup>Tam</sup> treated with or without 4-hydroxytamoxifen (4OHT) were stimulated with PDGF-BB (50 ng ml<sup>-1</sup>) or H<sub>2</sub>O<sub>2</sub> (1 mM) for 10 min. Cells were fixed in the presence of dimedone, and immunostained with anti-dimedone Cys antibodies (green). Representative images are shown for each condition from one of 2 independent experiments. Lysates from *Ptpn11*<sup>fl/fl</sup> MEFs were immunoblotted with anti-SHP2 and anti-ERK2 antibodies. The graph shows the average intensities of the anti-dimedonylated cysteine signal, with the background signal in each image subtracted, relative to the values in untreated cells ( $n = 10$  images). Error bars represent SD. ns: not significant, ANOVA with Bonferroni/Dunn's post-hoc test. Scale bars: 50  $\mu$ m.

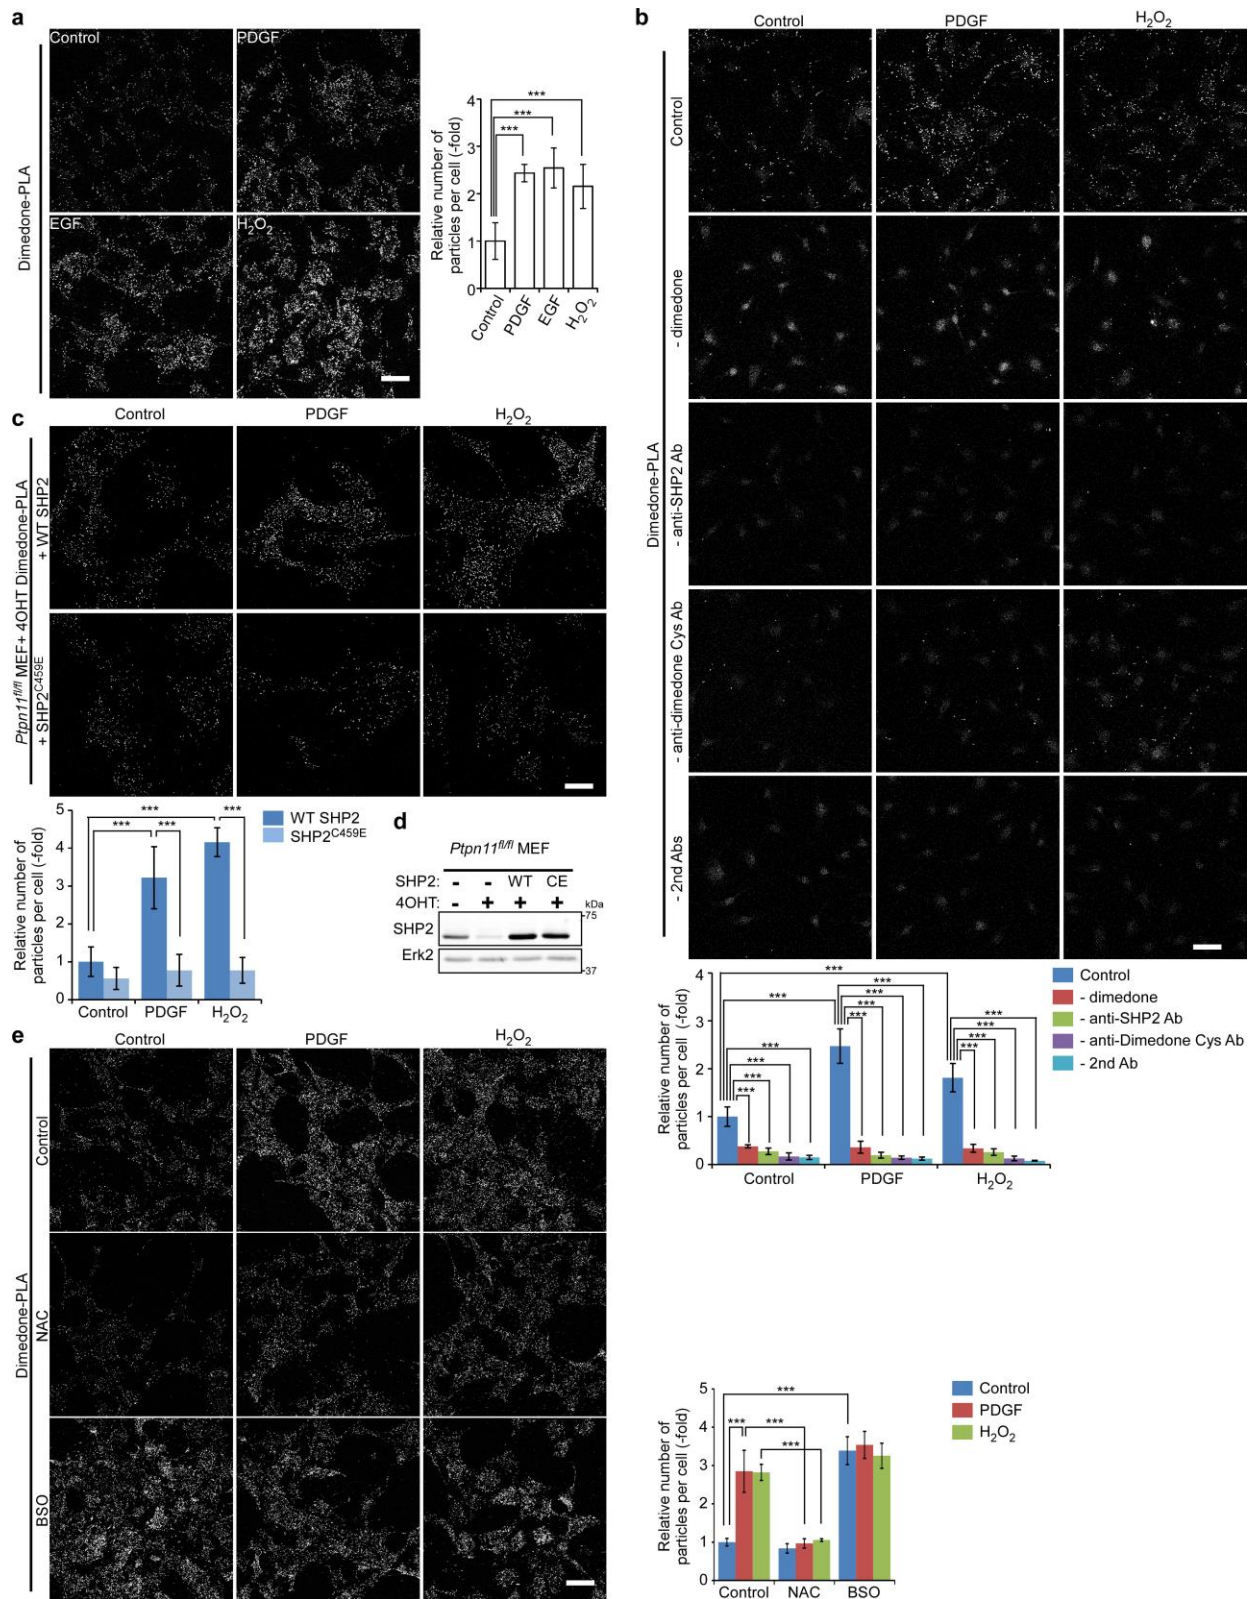

**Supplementary Fig. 2.** Specific detection of oxidized SHP2 by dimedone-PLA. **(a)** Serum-starved Swiss 3T3 cells were stimulated with PDGF-BB (50 ng ml<sup>-1</sup>), EGF (50 ng ml<sup>-1</sup>), or H<sub>2</sub>O<sub>2</sub> (1 mM) for 10 min, fixed in the presence of dimedone (5 mM) for 5 min, and subjected to dimedone-PLA (gray). Representative images are shown for each condition from one of 3 independent experiments. The graph shows the average number of PLA signals per cell ( $n = 6$  images for each condition, 5-20 cells in an image), relative to unstimulated control cells (normalized to 1). Error bars represent SD. \*\*\* $P < 0.0001$ , ANOVA with Bonferroni/Dunn's post-hoc test. **(b)** Serum-starved Swiss 3T3 cells were stimulated with PDGF-BB (50 ng ml<sup>-1</sup>) or H<sub>2</sub>O<sub>2</sub> (1 mM) for 10 min, fixed in the presence or absence of dimedone for 5 min, and subjected to dimedone-PLA (gray) with or without either primary or secondary antibody. Representative images are shown for each condition from one of 2 independent experiments. The graph shows the average number of PLA signals per cell ( $n = 6$  images for each condition, 5-20 cells in an image) relative to control cells without stimulation. Error bars represent SD. \*\*\* $P < 0.0001$ , ANOVA with Bonferroni/Dunn's post-hoc test. **(c)** 4-OHT-treated, serum-starved *Ptpn11*<sup>fl/fl</sup> MEFs expressing Cre-ER<sup>Tam</sup> with re-expression of either wild-type SHP2 (WT SHP2) or C459E SHP2 (SHP2<sup>C459E</sup>) were stimulated with PDGF-BB (50 ng ml<sup>-1</sup>) or H<sub>2</sub>O<sub>2</sub> (1 mM) for 10 min. Cells were fixed in the presence of dimedone, and subjected to dimedone-PLA (gray). Representative images are shown for each condition from one of 2 independent experiments. The graph shows the average number of PLA signals per cell ( $n = 6$  images for each condition, 5-20 cells in an image) relative to control cells without stimulation. Error bars represent SD. \*\*\* $P < 0.0001$ , ANOVA with Bonferroni/Dunn's post-hoc test. **(d)** Lysates from *Ptpn11*<sup>fl/fl</sup> MEFs with or without 4-OHT treatment, and MEFs treated with 4-OHT re-expressing either WT SHP2 or SHP2<sup>C459E</sup> were immunoblotted with indicated antibodies. Representative immunoblots are shown from one of 2 experiments. **(e)** Serum-starved Swiss 3T3 cells, pre-treated with NAC (10 mM, 15 min) or BSO (2.5 mM, 16 h), were stimulated with PDGF-BB (50 ng ml<sup>-1</sup>) or H<sub>2</sub>O<sub>2</sub> (1 mM) for 10 min, fixed in the presence of dimedone for 5 min, and subjected to dimedone-PLA (gray). Representative images are shown for each condition from one of 2 independent experiments. The graph shows the average number of PLA signals per cell ( $n = 6$  images for each condition, 5-20 cells in an image) relative to unstimulated control cells. Error bars represent SD. \*\*\* $P < 0.0001$ , ANOVA with Bonferroni/Dunn's post-hoc test. Scale bars: 50  $\mu$ m.

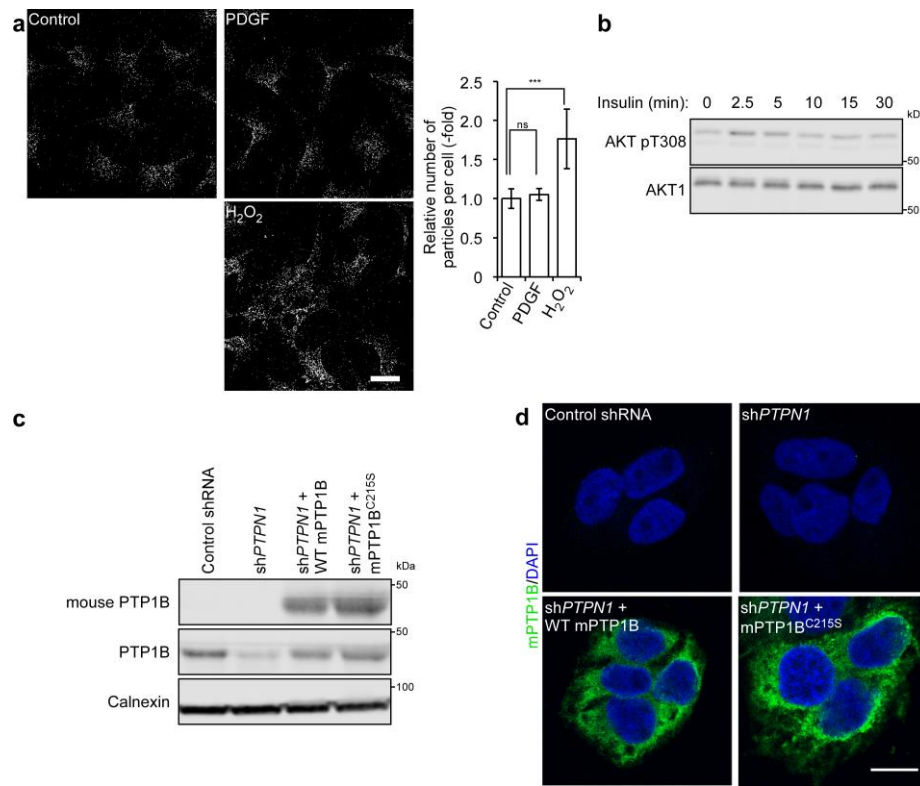

**Supplementary Fig. 3.** Dimedone-PLA detects oxidized PTP1B. **(a)** Serum-starved Swiss 3T3 cells were treated with PDGF-BB (50 ng ml<sup>-1</sup>) or H<sub>2</sub>O<sub>2</sub> (1 mM) for 10 min, fixed in the presence of dimedone (5 mM) for 5 min, and subjected to dimedone-PLA for PTP1B (gray). Representative images are shown for each condition from one of 2 independent experiments. The graph shows the average number of PLA signals per cell ( $n = 6$  images for each condition, 5-20 cells in an image), relative to untreated control cells (set to 1). Error bars represent SD. \*\*\* $P < 0.0001$ , ns: not significant, ANOVA with Bonferroni/Dunn's post-hoc test. Scale bar: 50  $\mu$ m. **(b)** Serum-starved HepG2 cells were treated with insulin (25 nM) for the indicated times. Lysates were immunoblotted with anti-AKT pT308 and anti-AKT1 antibodies. Representative images are shown for each condition from one of 2 independent experiments. **(c)** Lysates from HepG2 cells expressing control shRNA or shRNA targeting human *PTPN1* (shPTPN1) with or without stable expression of mouse PTP1B (WT mPTP1B) or C215S PTP1B (mPTP1B<sup>C215S</sup>) were immunoblotted with anti-mouse PTP1B, anti-PTP1B antibodies that recognize both mouse and human PTP1B, and anti-calnexin antibodies. Representative immunoblots are shown from one of 2 independent experiments. **(d)** HepG2 cells expressing control shRNA or shPTPN1 with or without stable expression of WT mPTP1B or mPTP1B<sup>C215S</sup> were immunostained with anti-mouse PTP1B antibodies (green). Nuclei were visualized with DAPI (blue). Representative images are shown for each condition from one of 2 independent experiments. Scale bar: 10  $\mu$ m.

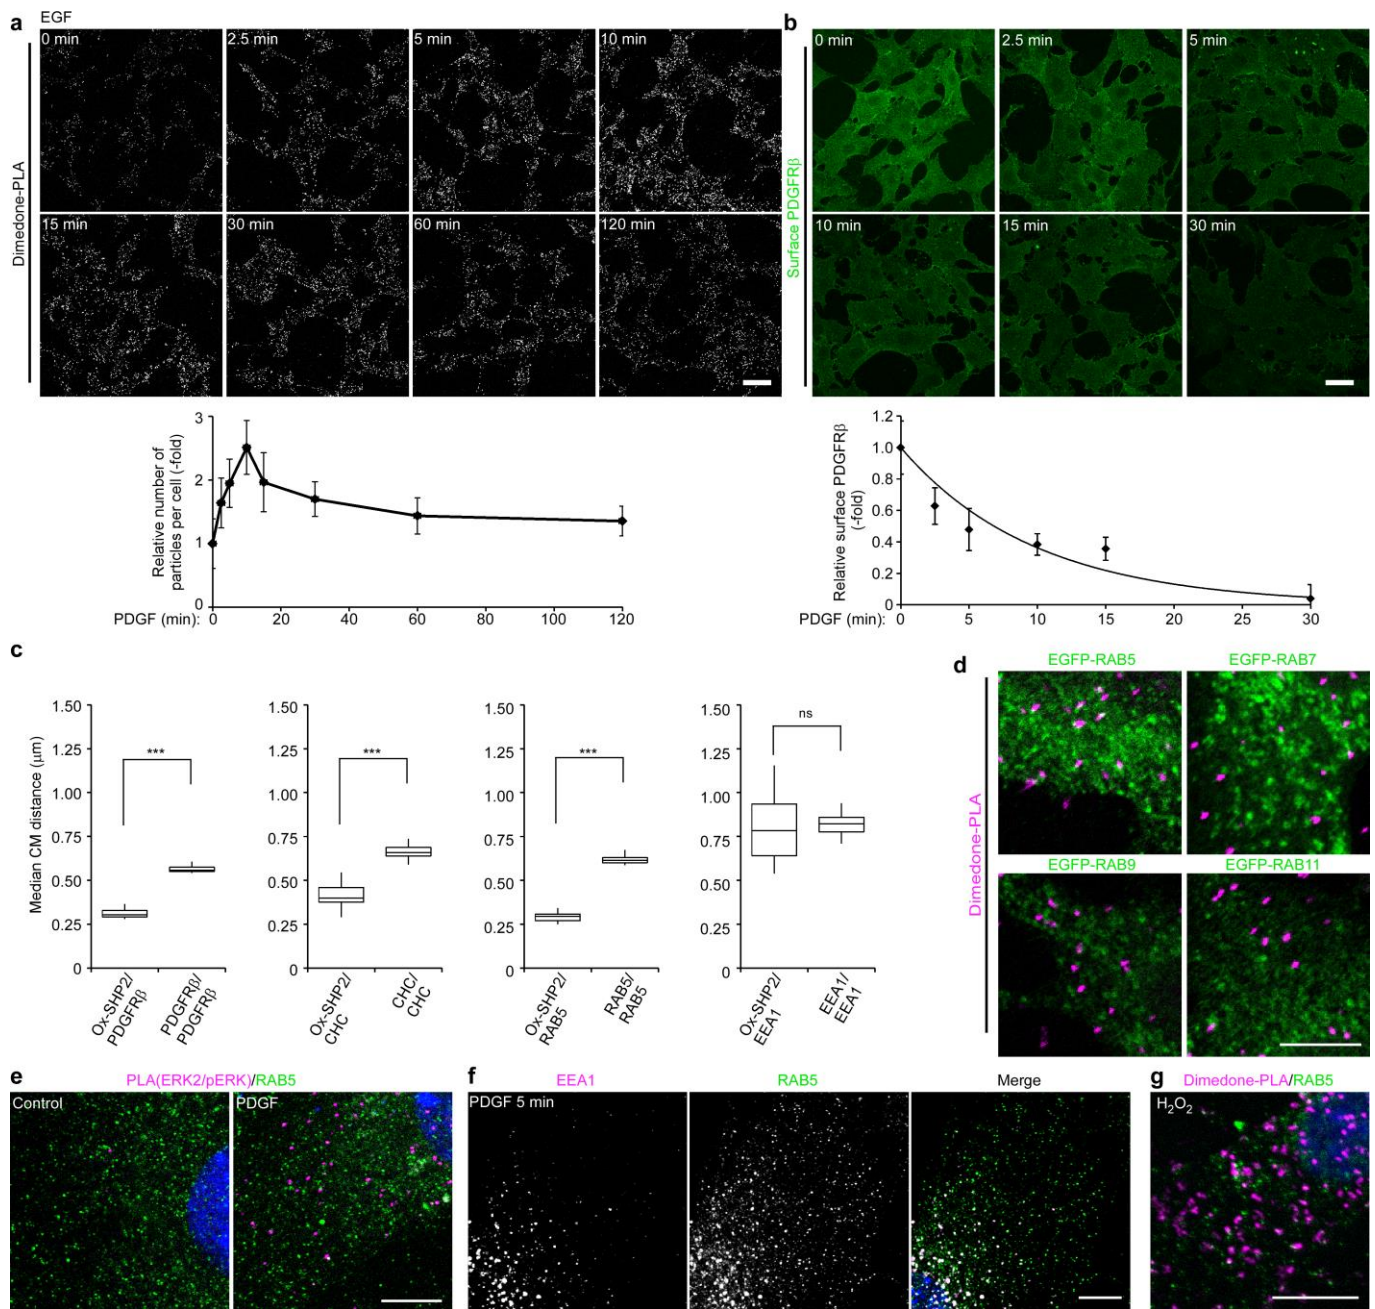

**Supplementary Fig. 4.** Spatio-temporal dynamics of SHP2 oxidation. (a) Serum-starved Swiss 3T3 cells were stimulated with EGF ( $50 \text{ ng ml}^{-1}$ ) for the indicated times, fixed in the presence of dime-done, and subjected to dime-done-PLA. Representative images are shown for each condition from one of 2 independent experiments. The graph shows the average number of PLA signals per cell ( $n = 6$  images for each condition, 5-20 cells in an image) relative to unstimulated control cells (normalized to 1). Error bars represent SD. Scale bar:  $50 \mu\text{m}$ . (b) Serum-starved Swiss 3T3 cells were stimulated with PDGF ( $50 \text{ ng ml}^{-1}$ ) for the indicated times, fixed, and subjected to immunostaining with anti-PDGFR $\beta$  antibodies

without permeabilization to visualize surface PDGFR $\beta$ . Representative images are shown for each condition from one of 2 independent experiments. The graph shows the average fluorescence intensities of the surface PDGFR $\beta$  signal with the background signal in the image subtracted, relative to the values in untreated cells ( $n = 10$  images). Error bars represent SD. Scale bar: 50  $\mu\text{m}$ . (c) Serum-starved Swiss 3T3 cells were treated with 50 ng ml $^{-1}$  PDGF-BB for 2.5 min (see Fig. 2b). Median distances of the centers of mass between punctate signals of ox-SHP2 and of the nearest indicated marker signal, or median distances of between punctate signals of indicated marker themselves, were obtained by object-based image analysis. Box-whisker plots show the 25 $^{\text{th}}$ -75 $^{\text{th}}$  percentiles (boxes) and the 5 $^{\text{th}}$ -95 $^{\text{th}}$  percentiles (whiskers) of median distances ( $n = 50$  cells). \*\*\* $P < 0.0001$ , ns: not significant, unpaired  $t$  test (PDGFR $\beta$  and RAB5) or unpaired Welch's  $t$  test (CHC and EEA1), as appropriate. (d) Swiss 3T3 cells expressing EGFP-fused RAB5, RAB7, RAB9, or RAB11 were serum-starved, stimulated with PDGF-BB (50 ng ml $^{-1}$ ) for 10 min, and then fixed in the presence of dimedone. Dimedone-PLA (magenta) and anti-GFP staining (green) are shown. Representative images are shown for each condition from one of 2 independent experiments. Scale bar: 10  $\mu\text{m}$ . (e) Serum-starved Swiss 3T3 cells were stimulated with PDGF-BB (50 ng ml $^{-1}$ ) for 5 min, fixed, subjected to PLA with anti-ERK2 and anti-pERK1/2 antibodies (magenta), and co-stained with the anti-RAB5 antibody (green). Representative images are shown for each condition from one of 2 independent experiments. Scale bar: 10  $\mu\text{m}$ . (f) Serum-starved Swiss 3T3 cells were treated with PDGF-BB (50 ng ml $^{-1}$ ) for 5 min and immunostained with anti-RAB5 (gray or green) and anti-EEA1 (gray or magenta) antibodies. Nuclei were labeled with DAPI (blue). Representative images are shown from a single experiment. Scale bar: 10  $\mu\text{m}$ . (g) Serum-starved Swiss 3T3 cells were treated with H $_2$ O $_2$  (1 mM) for 10 min and subjected to dimedone-PLA (magenta), followed by immunostaining with anti-RAB5 antibody. Nuclei were labeled with DAPI (blue). Representative images are shown from one of 2 independent experiments. Scale bar: 10  $\mu\text{m}$ .



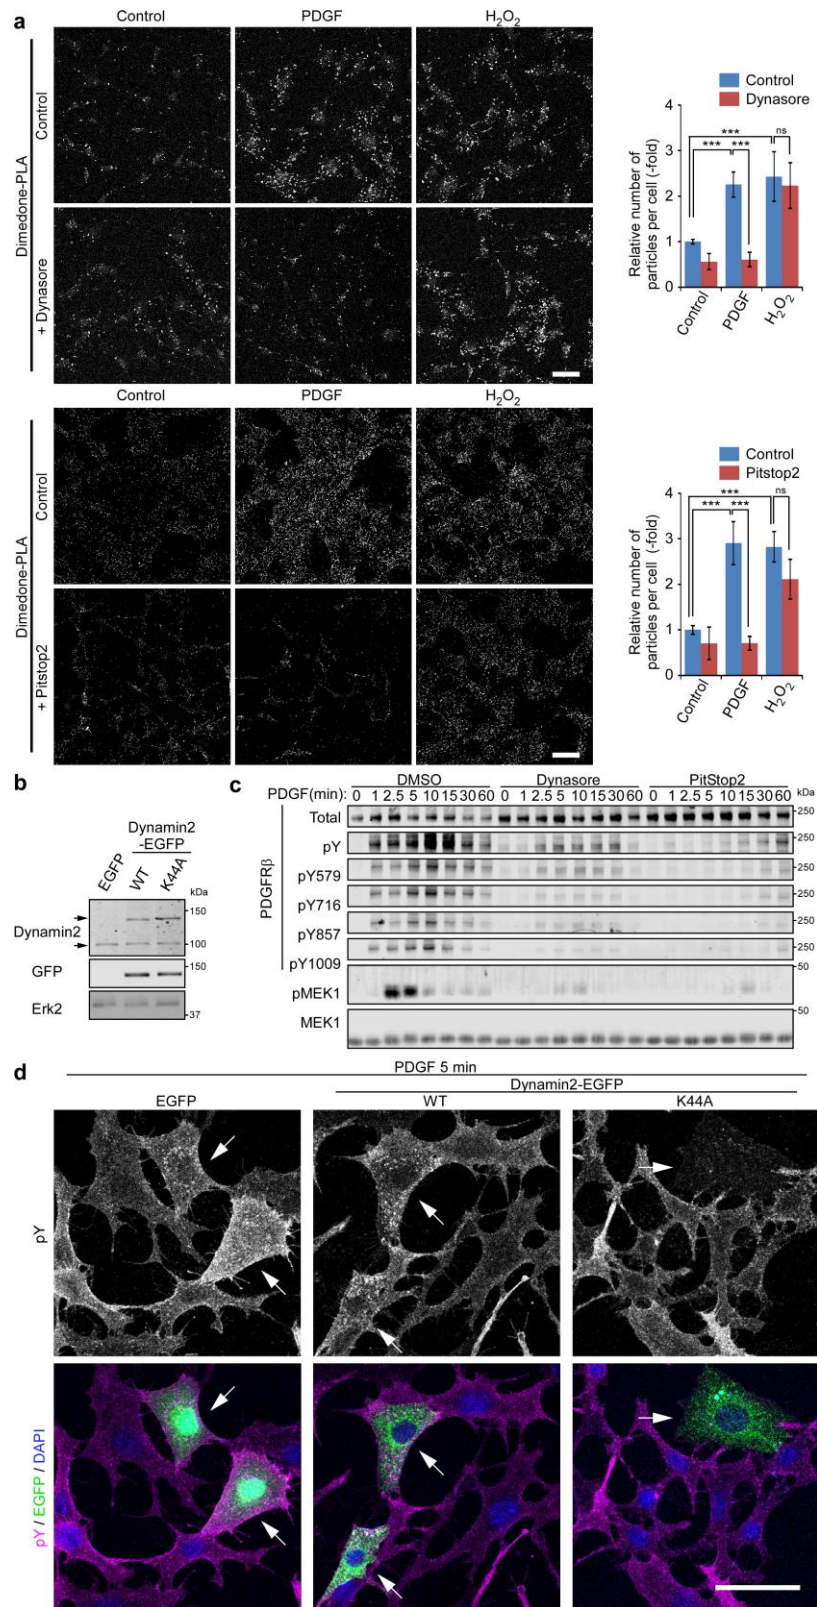

**Supplementary Fig. 5.** Involvement of endocytosis in SHP2 oxidation. **(a)** Serum-starved Swiss 3T3 cells were pre-treated with Dynasore (50  $\mu\text{M}$ ) (top panels) or Pitstop<sup>®</sup> 2 (25  $\mu\text{M}$ ) (bottom panels) for 30 min, stimulated with PDGF-BB (50 ng ml<sup>-1</sup>) or H<sub>2</sub>O<sub>2</sub> (1 mM) for 10 min in the presence of the inhibitor, and then subjected to dimedone-PLA (gray). Representative images are shown for each condition from one of 3 independent experiments. Graphs show the average number of PLA signals per cell ( $n = 6$  images for each condition, 5-20 cells in an image), relative to unstimulated control cells (set to 1). Error bars represent SD. \*\*\* $P < 0.0001$ , ns: not significant, ANOVA with Bonferroni/Dunn's post-hoc test. **(b)** Lysates from Swiss 3T3 cells expressing EGFP-fused wild-type dynamin 2 (WT Dynamin2) or dominant-negative dynamin 2 (dynamin2<sup>K44A</sup>) (see Fig. 3d) were immunoblotted with the indicated antibodies. Arrows indicate exogenous (EGFP-fused) and endogenous dynamin, respectively. Representative immunoblots are shown from one of 2 experiments. **(c)** Serum-starved Swiss 3T3 cells were pre-treated with Dynasore (50  $\mu\text{M}$ ) or Pitstop<sup>®</sup> 2 (25  $\mu\text{M}$ ) for 30 min, and stimulated with PDGF-BB (50 ng ml<sup>-1</sup>) for the indicated times. Lysates were subjected to immunoblotting with the indicated antibodies. Representative immunoblots from one of 3 experiments are shown. **(d)** Serum-starved Swiss 3T3 cells expressing EGFP, EGFP-WT dynamin2 or EGFP-K44A dynamin2 were stimulated with PDGF-BB (50 ng ml<sup>-1</sup>) for 5 min. Cells were stained with an anti-pTyr (gray or magenta) antibody cocktail. EGFP is shown in green; nuclei are stained with DAPI. Representative images are shown for each condition from one of 2 independent experiments. Arrows indicate cells expressing EGFP or EGFP-dynamin2. Scale bars: 50  $\mu\text{m}$ .

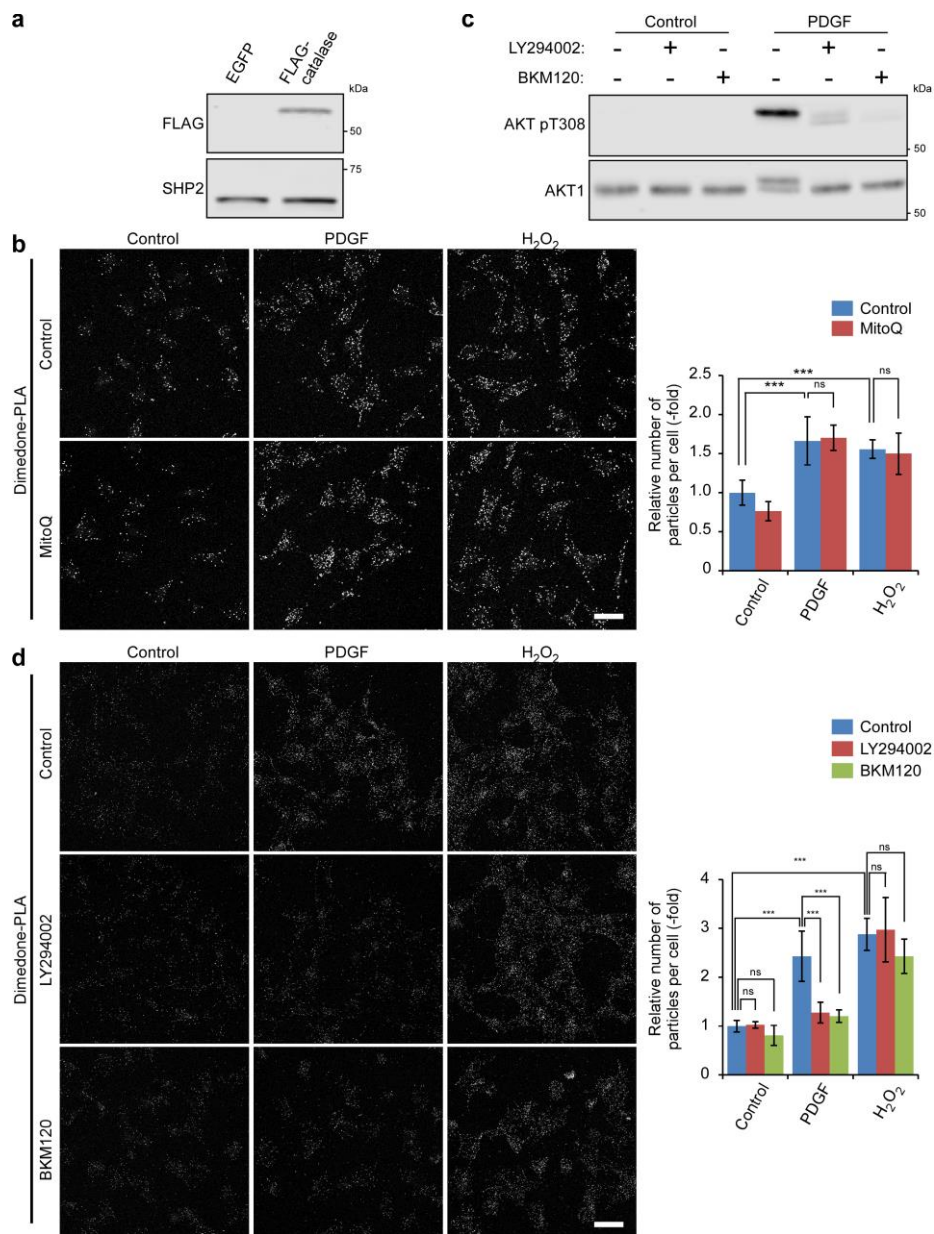

**Supplementary Fig. 6.** PDGF-evoked SHP2 oxidation requires H<sub>2</sub>O<sub>2</sub> and PI3K activity but not mitochondrial ROS. **(a)** Lysates from Swiss 3T3 cells stably expressing EGFP or Flag-tagged cytoplasmic catalase were immunoblotted with the indicated antibodies (see Fig. 4a). Representative immunoblots from one of 2 experiments are shown. **(b)** Serum-starved Swiss 3T3 cells were pre-treated with MitoQ (1  $\mu$ M) for 1 h, stimulated with PDGF-BB (50 ng ml<sup>-1</sup>) or H<sub>2</sub>O<sub>2</sub> (1 mM) for 10 min, fixed in the presence of dimedone, and subjected to dimedone-PLA (gray). Representative images are shown for each condition from one of 2 independent experiments. Graphs show the average number of PLA signals per cell ( $n = 6$  images for each condition, 5-15 cells in an image), relative to unstimulated cells. Error bars represent SD.

\*\*\* $P < 0.0001$ , ns: not significant, ANOVA with Bonferroni/Dunn's post-hoc test. (c) Serum-starved Swiss 3T3 cells were pre-treated with LY294002 (20  $\mu\text{M}$ ) or BKM120 (20  $\mu\text{M}$ ) for 1 h, stimulated with PDGF-BB (50  $\text{ng ml}^{-1}$ ) for 10 min. Lysates were subjected to immunoblotting with anti-AKT pT308 and anti-AKT antibodies. Representative immunoblots from one of 2 experiments are shown. (d) Serum-starved Swiss 3T3 cells were pre-treated with LY294002 (20  $\mu\text{M}$ ) or BKM120 (20  $\mu\text{M}$ ) for 1 h, stimulated with PDGF-BB (50  $\text{ng ml}^{-1}$ ) or  $\text{H}_2\text{O}_2$  (1  $\text{mM}$ ), fixed in the presence of dimedone, and subjected to dimedone-PLA (gray). Representative images are shown for each condition from one of 2 independent experiments. The graph shows the average number of PLA signals per cell ( $n = 6$  images for each condition, 10-25 cells in an image), relative to unstimulated cells. Error bars represent SD. \*\*\* $P < 0.0001$ , ns: not significant, ANOVA with Bonferroni/Dunn's post-hoc test. Scale bars: 50  $\mu\text{m}$ .

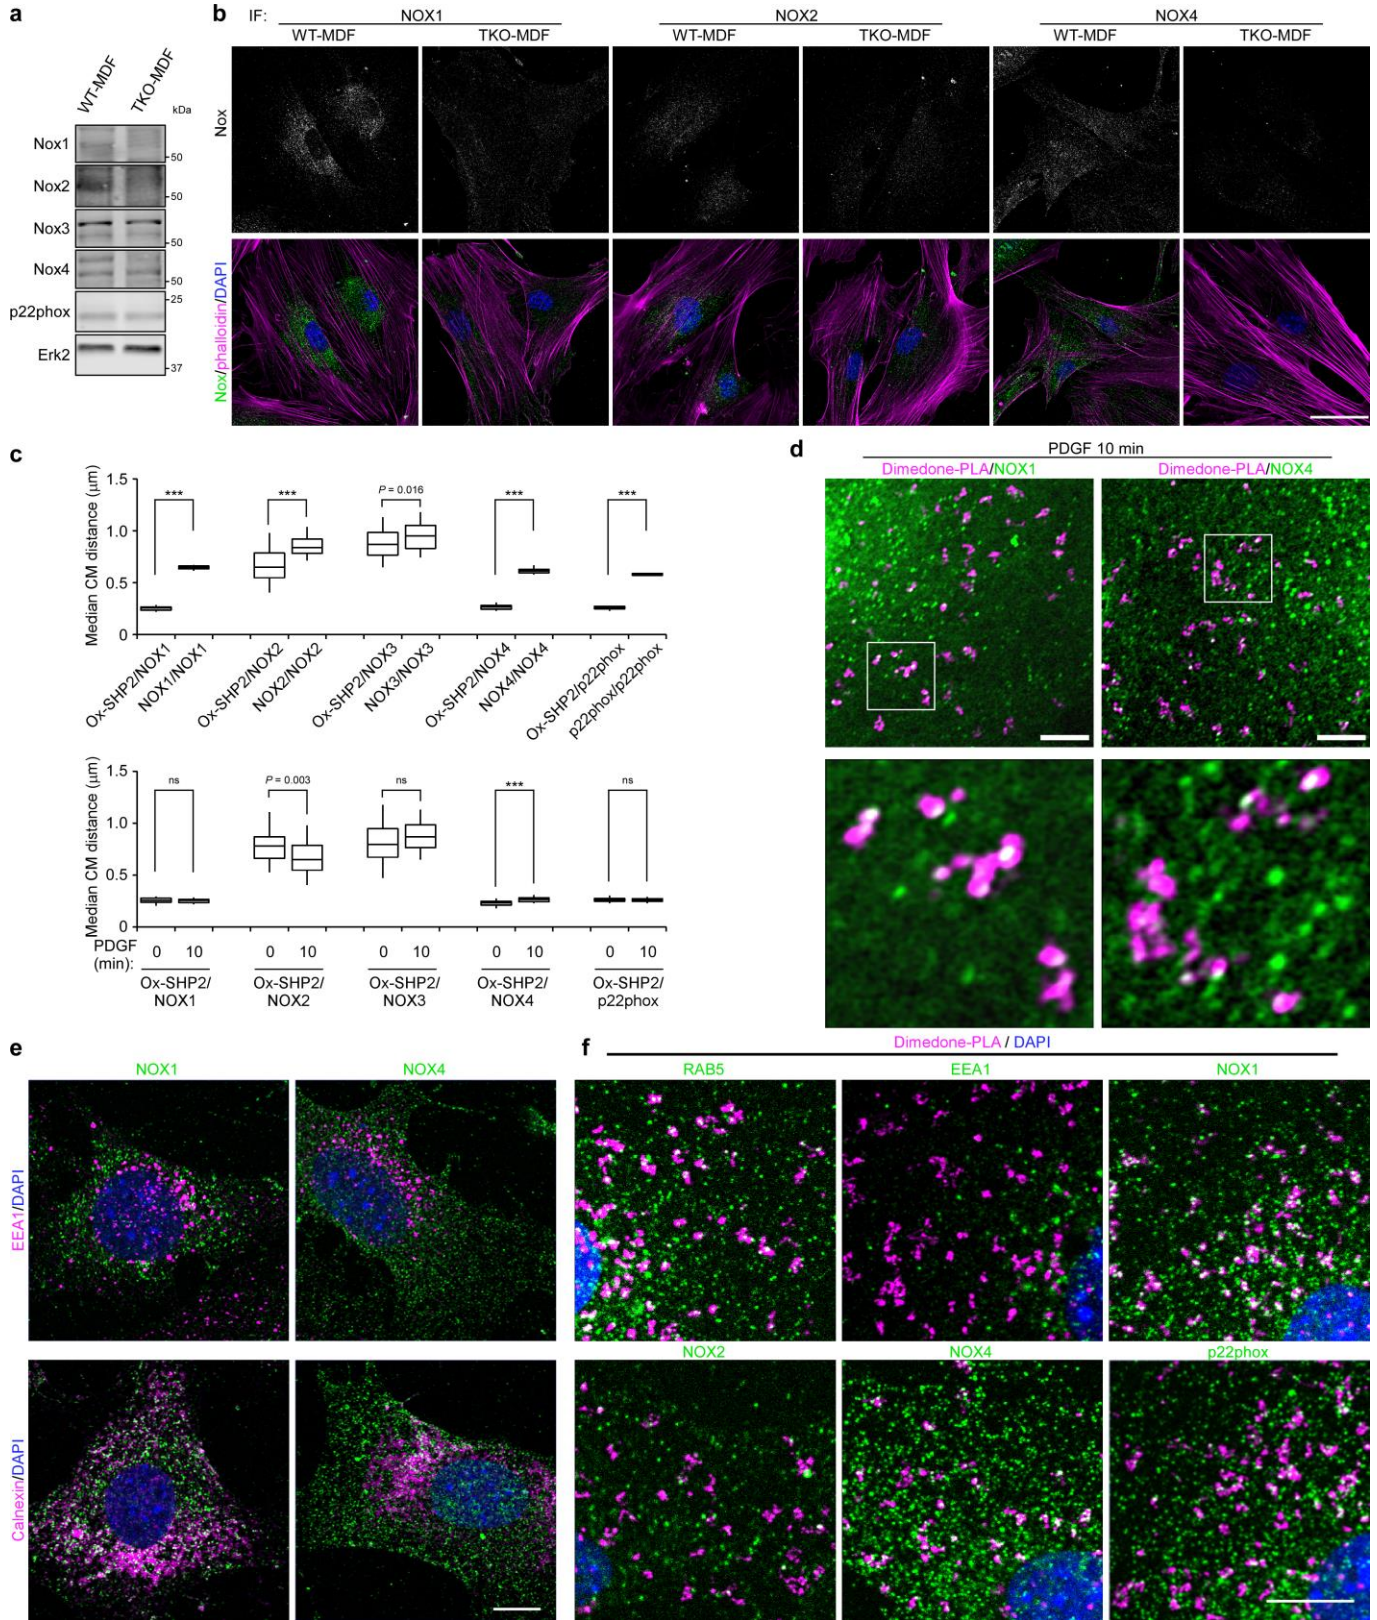

**Supplementary Fig. 7.** NOX complexes co-localize with oxidized SHP2. **(a)** Anti-NOX antibodies are specific. Lysates from primary murine dermal fibroblasts (MDFs) from wild type (WT) or *Nox1,2,4* triple-KO (TKO) animals were subjected to immunoblotting with the indicated antibodies. Representative immunoblots are shown from one of 2 experiments. **(b)** WT- or TKO-MDFs were immunostained with the indicated anti-NOX antibodies (gray and green). Nuclei and actin cytoskeleton were stained with DAPI (blue) and phalloidin (magenta), respectively. Representative images are shown for each condition from one of 2 independent experiments. Scale bar: 50  $\mu\text{m}$ . **(c)** Serum-starved Swiss 3T3 cells were treated with PDGF-BB (50  $\text{ng ml}^{-1}$ ) for 10 min. The median distances of centers of mass between punctate signals of ox-SHP2 and the nearest indicated marker signal, or median distances of between punctate signals of the indicated markers themselves, were obtained by object-based image analysis. Also see Fig. 3c. Top panel shows comparisons between ox-SHP2-to-marker and marker-to marker distances at 10 min after PDGF stimulation. Note that although all of the inter-marker distances are less than the intra-marker distances, the inter-marker distances between the ox-SHP2/NOX2 and ox-SHP2/NOX3 comparisons are far too large to indicate co-localization (compare distance scale on y-axis). Bottom panel shows data from the same experiment indicating ox-SHP2-to-marker distances before and after PDGF-BB (10 min) stimulation. Box-whisker plots with the 25<sup>th</sup>-75<sup>th</sup> percentiles (boxes) and the 5<sup>th</sup>-95<sup>th</sup> percentiles (whiskers) of the median distances ( $n = 50$  cells each), \*\*\* $P < 0.0001$ , unpaired  $t$  test or unpaired Welch's  $t$  test, as appropriate. **(d)** Serum-starved Swiss 3T3 cells were stimulated with PDGF-BB (50  $\text{ng ml}^{-1}$ ) for 10 min, and subjected to dimedone-PLA labeling of ox-SHP2 (magenta) followed by immunolabeling with either anti-NOX1 or anti-NOX4 antibodies (green). Representative semi-super resolution microscopic images (AiryScan) are shown from one of 2 independent experiments. Higher magnification images of the boxed regions are shown at the bottom. Scale bars: 5  $\mu\text{m}$ . **(e)** Swiss 3T3 cells were immunostained with anti-NOX1 or anti-NOX4 (green) and anti-EEA1 or anti-calnexin (ER marker) (magenta) antibodies. Nuclei were stained with DAPI (blue). Representative images for each condition from one of 2 independent experiments are shown. Scale bar: 10  $\mu\text{m}$ . **(f)** Serum-starved Swiss 3T3 fibroblasts were stimulated with EGF (50  $\text{ng ml}^{-1}$ ) for 5 min, and fixed in the presence of dimedone. Co-staining of dimedone-PLA labeling ox-SHP2 (magenta) and indicated antibodies (green) is shown. Representative images are shown for each condition from one of 2 independent experiments. Nuclei were stained with DAPI (blue). Scale bar: 10  $\mu\text{m}$ .

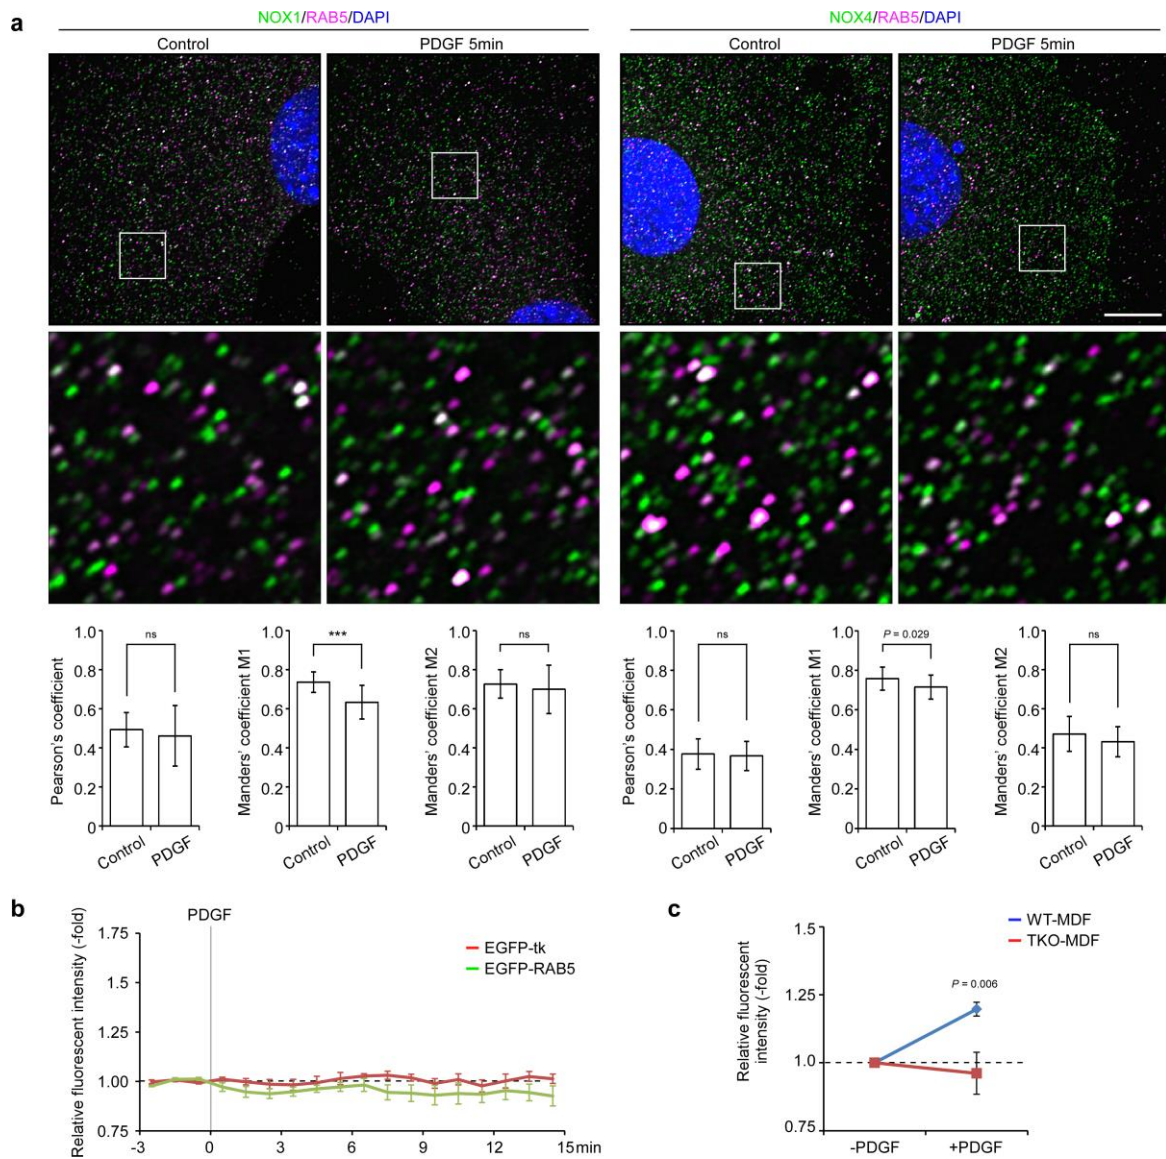

**Supplementary Fig. 8.** PDGF-evoked redoxosome formation. **(a)** Serum-starved Swiss 3T3 cells were stimulated with or without PDGF-BB ( $50 \text{ ng ml}^{-1}$ ) for 5 min, immunostained with anti-RAB5 (magenta) and anti-NOX4 (green) antibodies and visualized by semi-super resolution microscopy (AiryScan). Higher magnification images of the boxed regions are shown at the bottom. Representative images are shown for each condition from one of 2 independent experiments. Scale bar:  $10 \mu\text{m}$ . Graphs show Pearson's or Manders' coefficients for co-localization of RAB5 and NOX1 (left) or RAB5 and NOX4 (right) before and after PDGF-BB stimulation ( $n = 20$  ROIs from 10 cells).  $***P < 0.0001$ , ns: not significant, Unpaired two-tailed  $t$  test or Welch's  $t$  test, as appropriate. Error bars represent SD. **(b)** Serum-starved Swiss 3T3 cells expressing plasma membrane-targeted EGFP (EGFP-tk) or RAB5-fused EGFP (EGFP-RAB5) were subjected to live-cell time-lapse imaging, and fluorescence intensity was

monitored at 1 min intervals. PDGF-BB ( $50 \text{ ng ml}^{-1}$ ) was added, as indicated, after the third scan. Graph shows the relative fluorescence intensities of individual cells ( $n = 7$  cells each from individual time-lapse experiments), setting the average of the first 3 time-points to 1. Error bars represent SEM. (c) Serum-starved WT- or TKO-MDFs expressing HyPer3-RAB5 were subjected to live-cell time-lapse imaging, and fluorescence intensity was monitored. Graph shows the relative fluorescence intensities of individual cells ( $n = 5$  cells each from individual time-lapse experiments) before and 5 min after PDGF-BB stimulation, with unstimulated cell values normalized to 1. P value was calculated with two-tailed Welch's *t* test. Error bars represent SD.



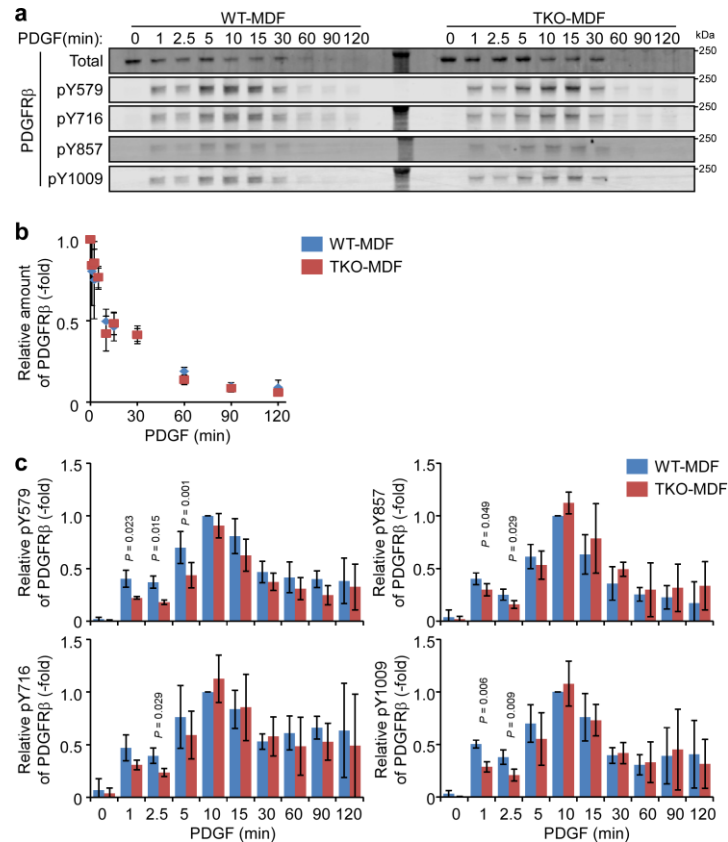

**Supplementary Fig. 9.** NOX activity is necessary for PDGF signaling. **(a)** Serum-starved WT- or TKO-MDFs were stimulated with PDGF-BB ( $50 \text{ ng ml}^{-1}$ ) for the indicated times. Lysates were subjected to immunoblotting with the indicated antibodies. Representative immunoblots are shown from one of 4 experiments. **(b)** Graph shows the relative amount of PDGFR $\beta$  (compared to ERK2) at various times following PDGF addition, as obtained from immunoblots, with the level at time 0 normalized to 1. Data are means  $\pm$ SD ( $n = 4$ ). **(c)** Relative phosphorylation of PDGFR $\beta$  on the indicated tyrosine residues compared to total PDGFR $\beta$  at the indicated times, as obtained from immunoblots. For each residue, the value in WT-MDF at 10 min is set as 1. Data are means  $\pm$ SD ( $n = 4$ ). P values were calculated using paired two-tailed  $t$  tests.

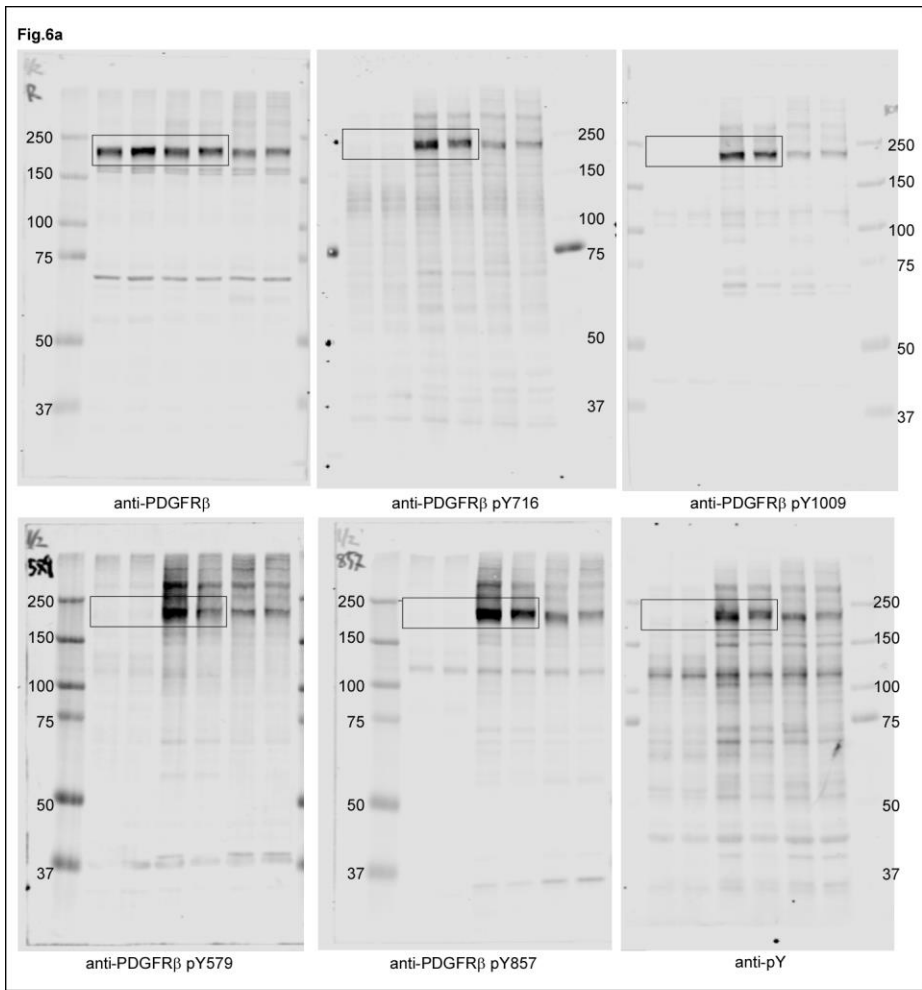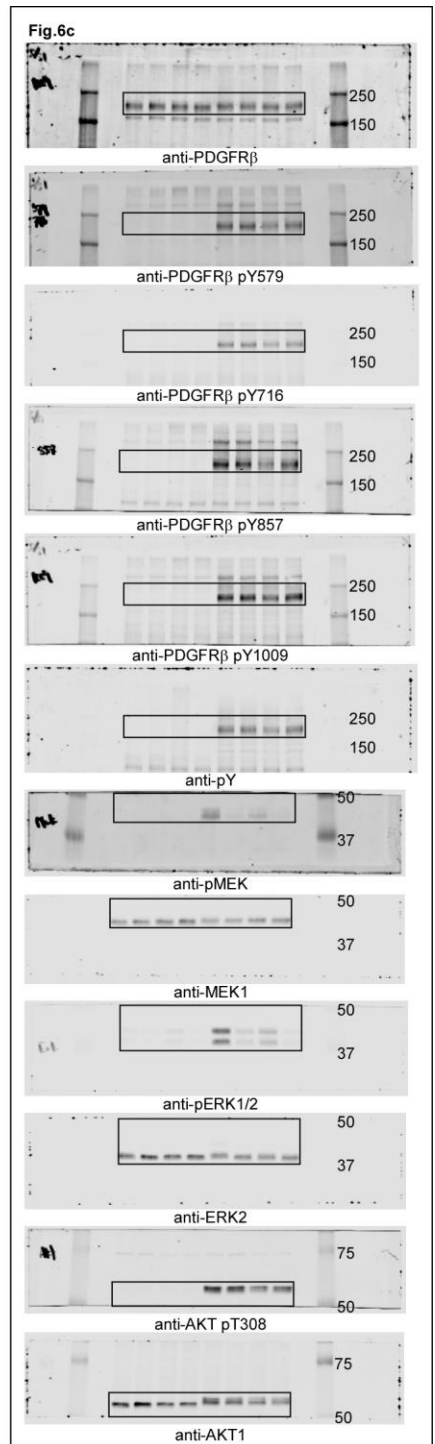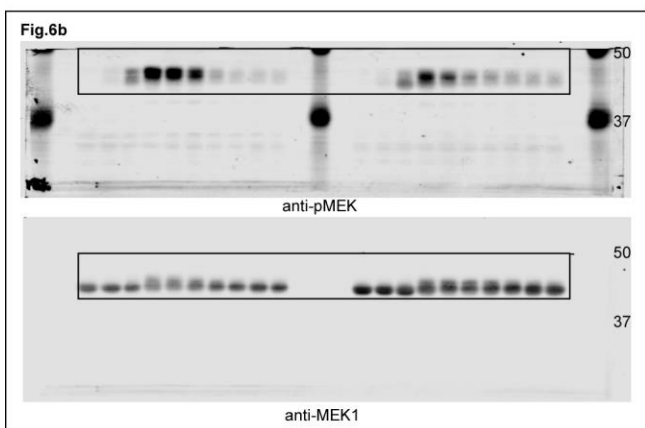

**Supplementary Fig. 10.** Uncropped immunoblot images presented in Figures.
